# Supplementary material
Source: publisher site journal article supplement (https://journals.iucr.org/services/coeditors/meetings/jmb/2024/AppendixI.pdf)
Supplement: Supplementary file 1 [file AppendixI.pdf]

**Retirement/appointment information****Acta A**

Dave Keen (VK) has retired, might need a replacement Co-editor for this field.

Branton Campbell has agreed to start but has not sent all documents yet.

Phil Willmott (WO) should have retired by now but handles very few papers in a niche area so it was agreed a while ago that he could stay on.

**Acta B**

We would like to keep some of these.

Main Editors

Marc de Boissieu

Co-editors

R. Černý, Switzerland

M. Du, China

A. Katrusiak, Poland

J. Lipkowski, Poland

Co-editors who should have retired but agreed to stay on

Pierre Bordet, France

Michal Dušek, Czech Republic

**Acta C**

Main Editors: Paul Raithby and Larry Falvello (retired after Melbourne Congress)

Co-editors: Tong-Bu Lu, Chris Frampton, Louise Dawe (moved to Acta B), Eugene Cheung, Michael Gardiner (retired January 2024) and Stephen Moggach (retiring April 2024)

New appointments: Carol Hua (Deakin University, Australia) and Xiaoping Wang (ORNL, USA)

**Acta D**

Co-editor retirements:

Zygmunt Derewenda

Kay Diederichs

Quan Hao

Paul Langan

Co-editor appointments:

Svetlana Antonyuk

Evangelia Chrysina

Rhys Grinter

Jawei Wang

Hongyi Xu

Replacement for Paul Langan is being considered.

**Acta E**

New Co-editors started September 2023:

T Alitsu, Japan (M)

N. Alvarez, Uruguay (F)

M. Delgado, Venezuela (M)

F. Di Salvo, Argentina (F)

K. Domasevitch, Ukraine (M)

F. Ferreira, Brazil (M)

G. Ferrence, USA (M)

X. Hao, China (M)

S. Kelley, USA (M)

D. Manke, USA (M)

Y. Ozawa, Japan (M)

L. Suescun, Uruguay (M)

S.-L. Zheng, USA (M)

No further new appointments needed at this stage

## **Acta F**

Retirements:

Janet Newman (Section Editor)

Jean-Paul Renaud (Co-editor)

Appointments:

Jon Agirre (Section Editor)

Cristy Nonato (Section Editor)

Dorothee Liebschner (Co-editor, pending)

Further possible Co-editors are being approached.

## **IUCrData**

There are no retirements scheduled for IUCrData and the board is large enough to cope with the current level of submissions. Five new Co-editors were appointed in 2022 to handle raw data letters.

## **IUCrJ**

IUCrJ was launched in 2014, so in principle, nearly all Main and Co-editors are due for retirement. We would like to keep many of the editors.

Main Editors - Gautam Desiraju has retired; replaced 2024 by Susan Bourne

Other appointments in last 2-3 years:

A. Thorn (biology and medicine)

All cryo-EM Co-editors

All electron crystallography Co-editors

V. K. Peterson (neutron and synchrotron science and technology)

F. Maia, G. Williams (physics and free electron laser science and technology)

Biology and medicine: 4 new appointments needed.

Chemistry and crystal engineering: 2-3 new appointments needed

Materials and computation: 2-3 new appointments needed

Neutron and synchrotron science and technology: 2-3 new appointments needed

Physics and free electron laser science and technology: 1-2 new appointments needed

## **JAC**

Several Co-editors are due for retirement. We would like to keep those who are willing to stay on.

V. T. Forsyth - retired

A. R. Pearson - retired

S. Disch - appointed

P. Munshi - appointed

At least 3 new appointments needed.

## **JSR**

Svante Svensson - retired

Vincent Favre-Nicolin - retired

Atsushi Momose - staying on

Richard Strange - staying on

Makina Yabashi - staying on

Masaki Yamamoto - staying on

Manuel Guizar-Sicairos - appointed

Nongnuch Artrith - appointed

Rebecca Ingle - appointed

Diling Zhu - appointed

Gihan Kamel - appointed

Ongoing discussions about a Co-editor from SIRIUS, Brazil - Helio Tolentino?
